# Supplementary material for: Suitability of native milkweed (Asclepias) species versus cultivars for supporting monarch butterflies and bees in urban gardens
Source: PeerJ. 2020 Sep 25;8:e9823. doi: 10.7717/peerj.9823 (PMC7521339; doi:10.7717/peerj.9823)
Supplement: Supplemental Information 3 [file peerj-08-9823-s003.xlsx]

## Sheet: Cardenolides
HPLC Cardenolide Summary								Adam Baker samples Baker_SS1 started 8 March 2019 (53 samples with standards) - data collected by Steve Malcolm												?							Digitoxin
Species = Asclepias incarnata & A. tuberosa
		retention time (min) / area (to calculate cardenolide (µg))
sample ID	cardenolide	1	2	3	4	5	6	7	8	9	10	11	12	13	14	15	16	17	18	19	20	21	22	23	24	25	26	27	28	29	30	31	32	33	34	35	SUM	Sample dry wt (g)	Card Conc (µg/g)
vial 1	time																										56.378															sample weight extracted
Digitoxin	Area																										1836939
	cg amount (µg)	0	0	0	0	0	0	0	0	0	0	0	0	0	0	0	0	0	0	0	0	0	0	0	0	0	112.084	0	0	0	0	0	0	0	0	0	112.084		sum			note: the values for cardenolide concentration in columns AL and AN should be the same
	Card Conc (µg/g)
vial 2	time																										56.521											0.13616				questionable values
Inc-1	Area																										3690
	cg amount (µg)	0	0	0	0	0	0	0	0	0	0	0	0	0	0	0	0	0	0	0	0	0	0	0	0	0	0.225151	0	0	0	0	0	0	0	0	0	0.225151		sum			Digitoxin standard (note: should be 50µg but these are more than double - maybe because the detector mirror was replaced and so need to run a new calibration curve
	Card Conc (µg/g)	0	0	0	0	0	0	0	0	0	0	0	0	0	0	0	0	0	0	0	0	0	0	0	0	0	1.65358	0	0	0	0	0	0	0	0	0	1.65358		1.65358
vial 3	time											9.152																			60.357							0.30095
Inc-2	Area											9697																			1375
	cg amount (µg)	0	0	0	0	0	0	0	0	0	0	0.591677	0	0	0	0	0	0	0	0	0	0	0	0	0	0	0	0	0	0	0.0838977	0	0	0	0	0	0.675575		sum				1.65
	Card Conc (µg/g)	0	0	0	0	0	0	0	0	0	0	1.96603	0	0	0	0	0	0	0	0	0	0	0	0	0	0	0	0	0	0	0.278776	0	0	0	0	0	2.24481		2.24481				2.24
vial 4	time																														60.329	60.821						0.45955					1.34
Inc-3	Area																														1242	8879											11.07
	cg amount (µg)	0	0	0	0	0	0	0	0	0	0	0	0	0	0	0	0	0	0	0	0	0	0	0	0	0	0	0	0	0	0.0757825	0.541766	0	0	0	0	0.617548		sum				1.56
	Card Conc (µg/g)	0	0	0	0	0	0	0	0	0	0	0	0	0	0	0	0	0	0	0	0	0	0	0	0	0	0	0	0	0	0.164906	1.1789	0	0	0	0	1.34381		1.34381
vial 5	time																19.7		39.556		46.38											60.842						0.3383
Inc-4	Area																2540		4446		2343											52070
	cg amount (µg)	0	0	0	0	0	0	0	0	0	0	0	0	0	0	0	0.154982	0	0.271279	0	0.142962	0	0	0	0	0	0	0	0	0	0	3.17713	0	0	0	0	3.74635		sum
	Card Conc (µg/g)	0	0	0	0	0	0	0	0	0	0	0	0	0	0	0	0.45812	0	0.80189	0	0.422589	0	0	0	0	0	0	0	0	0	0	9.39146	0	0	0	0	11.0741		11.0741
vial 6	time																										56.283					60.855						0.33202
Inc-5	Area																										1687					6823
	cg amount (µg)	0	0	0	0	0	0	0	0	0	0	0	0	0	0	0	0	0	0	0	0	0	0	0	0	0	0.102935	0	0	0	0	0.416316	0	0	0	0	0.519251		sum
	Card Conc (µg/g)	0	0	0	0	0	0	0	0	0	0	0	0	0	0	0	0	0	0	0	0	0	0	0	0	0	0.310026	0	0	0	0	1.25389	0	0	0	0	1.56391		1.56391
vial 7	time					2.913					8.73								40.483		46.985						56.293			58.539								0.42823
Inc-6	Area					2093					4858								16208		12440						16415			14792
	cg amount (µg)	0	0	0	0	0.127708	0	0	0	0	0.296418	0	0	0	0	0	0	0	0.988956	0	0.759046	0	0	0	0	0	1.00159	0	0	0.902556	0	0	0	0	0	0	4.07627		sum
	Card Conc (µg/g)	0	0	0	0	0.298222	0	0	0	0	0.692194	0	0	0	0	0	0	0	2.3094	0	1.77252	0	0	0	0	0	2.3389	0	0	2.10764	0	0	0	0	0	0	9.51888		9.51888
vial 8	time										8.735						19.971		40.484					52.386			56.322					60.895						0.16867
IB-1	Area										9034						966		17474					2154			20662					1312
	cg amount (µg)	0	0	0	0	0	0	0	0	0	0.551223	0	0	0	0	0	0.058942	0	1.0662	0	0	0	0	0.13143	0	0	1.26072	0	0	0	0	0.0800537	0	0	0	0	3.14857		sum
	Card Conc (µg/g)	0	0	0	0	0	0	0	0	0	3.26806	0	0	0	0	0	0.349451	0	6.32124	0	0	0	0	0.779211	0	0	7.4745	0	0	0	0	0.474617	0	0	0	0	18.6671		18.6671
vial 9	time																		40.502					52.111			56.304				59.353				63.198			0.34444
IB-2	Area																		3951					1204			6813				1725				5603
	cg amount (µg)	0	0	0	0	0	0	0	0	0	0	0	0	0	0	0	0	0	0.241076	0	0	0	0	0.0734639	0	0	0.415706	0	0	0	0.105254	0	0	0	0.341876	0	1.17737		sum
	Card Conc (µg/g)	0	0	0	0	0	0	0	0	0	0	0	0	0	0	0	0	0	0.699908	0	0	0	0	0.213285	0	0	1.2069	0	0	0	0.305579	0	0	0	0.992555	0	3.41823		3.41823
vial 10	time																										56.182
Digitoxin	Area																										2043609
	cg amount (µg)	0	0	0	0	0	0	0	0	0	0	0	0	0	0	0	0	0	0	0	0	0	0	0	0	0	124.694	0	0	0	0	0	0	0	0	0	124.694		sum
	Card Conc (µg/g)
vial 11	time																										56.308											0.35145
IB-3	Area																										4549
	cg amount (µg)	0	0	0	0	0	0	0	0	0	0	0	0	0	0	0	0	0	0	0	0	0	0	0	0	0	0.277564	0	0	0	0	0	0	0	0	0	0.277564		sum
	Card Conc (µg/g)	0	0	0	0	0	0	0	0	0	0	0	0	0	0	0	0	0	0	0	0	0	0	0	0	0	0.789769	0	0	0	0	0	0	0	0	0	0.789769		0.789769
vial 12	time									7.666														52.049			56.304											0.28233
IB-4	Area									957														3084			2804
	cg amount (µg)	0	0	0	0	0	0	0	0	0.0583928	0	0	0	0	0	0	0	0	0	0	0	0	0	0.188175	0	0	0.17109	0	0	0	0	0	0	0	0	0	0.417658		sum
	Card Conc (µg/g)	0	0	0	0	0	0	0	0	0.206825	0	0	0	0	0	0	0	0	0	0	0	0	0	0.666507	0	0	0.605994	0	0	0	0	0	0	0	0	0	1.47933		1.47933
vial 13	time																		40.46								56.262								63.138			0.49488
IB-5	Area																		7320								9183								2083
	cg amount (µg)	0	0	0	0	0	0	0	0	0	0	0	0	0	0	0	0	0	0.446641	0	0	0	0	0	0	0	0.560315	0	0	0	0	0	0	0	0.127097	0	1.13405		sum
	Card Conc (µg/g)	0	0	0	0	0	0	0	0	0	0	0	0	0	0	0	0	0	0.902524	0	0	0	0	0	0	0	1.13222	0	0	0	0	0	0	0	0.256825	0	2.29157		2.29157
vial 14	time																		40.41		46.304	47.867	48.875	52.036	53.38	55.8	56.223			58.618								0.71778
IB-6	Area																		1388		1670	1170	2831	2503	8745	6888	3605			2459
	cg amount (µg)	0	0	0	0	0	0	0	0	0	0	0	0	0	0	0	0	0	0.0846909	0	0.101898	0.0713893	0.172738	0.152724	0.53359	0.420282	0.219965	0	0	0.15004	0	0	0	0	0	0	1.90732		sum
	Card Conc (µg/g)	0	0	0	0	0	0	0	0	0	0	0	0	0	0	0	0	0	0.11799	0	0.141962	0.0994585	0.240656	0.212773	0.743389	0.58553	0.306451	0	0	0.209033	0	0	0	0	0	0	2.65724		2.65724
vial 15	time					3.122				7.538														52.317								60.804			62.438			0.09365
CIN-1	Area					6077				5128														1490								9583			1216
	cg amount (µg)	0	0	0	0	0.370797	0	0	0	0.312893	0	0	0	0	0	0	0	0	0	0	0	0	0	0.0909146	0	0	0	0	0	0	0	0.584721	0	0	0.0741961	0	1.43352		sum
	Card Conc (µg/g)	0	0	0	0	3.9594	0	0	0	3.34109	0	0	0	0	0	0	0	0	0	0	0	0	0	0.970792	0	0	0	0	0	0	0	6.24369	0	0	0.79227	0	15.3072		15.3072
vial 16	time					3.156										14.825	20.165				46.225			52.358						58.639		60.803			62.865			0.42405
CIN-2	Area					7237										20902	1670				1617			3261						4698		16515			551
	cg amount (µg)	0	0	0	0	0.441577	0	0	0	0	0	0	0	0	0	1.27537	0.101898	0	0	0	0.0986637	0	0	0.198975	0	0	0	0	0	0.286656	0	1.00769	0	0	0.0336201	0	3.44444		sum
	Card Conc (µg/g)	0	0	0	0	1.04133	0	0	0	0	0	0	0	0	0	3.00759	0.240296	0	0	0	0.23267	0	0	0.469225	0	0	0	0	0	0.675995	0	2.37634	0	0	0.0792834	0	8.12273		8.12273
vial 17	time					3.235						9.07				14.819								52.344	53.39		56.553			58.646		60.794						0.49721
CIN-3	Area					41159						33670				72948								11166	6368		1248					28818
	cg amount (µg)	0	0	0	0	2.51138	0	0	0	0	0	2.05443	0	0	0	4.45103	0	0	0	0	0	0	0	0.681311	0.388553	0	0.0761486	0	0	0	0	1.75837	0	0	0	0	11.9212		sum
	Card Conc (µg/g)	0	0	0	0	5.05094	0	0	0	0	0	4.13191	0	0	0	8.95202	0	0	0	0	0	0	0	1.37027	0.781467	0	0.153152	0	0	0	0	3.53648	0	0	0	0	23.9762		23.9762
vial 18	time											9.075			13.231	14.832								51.058	53.225	55.142						60.836			62.49	64.258		0.28206
CIN-4	Area											5696			5140	4443								88526	44659	2643						21458			13606	31442
	cg amount (µg)	0	0	0	0	0	0	0	0	0	0	0.34755	0	0	0.313625	0.271096	0	0	0	0	0	0	0	5.40155	2.72494	0.161267	0	0	0	0	0	1.30929	0	0	0.830191	1.91848	13.278		sum
	Card Conc (µg/g)	0	0	0	0	0	0	0	0	0	0	1.23219	0	0	1.11191	0.96113	0	0	0	0	0	0	0	19.1504	9.66084	0.571746	0	0	0	0	0	4.64189	0	0	2.94331	6.80168	47.0751		47.0751
vial 19	time															14.821											56.271			58.6		60.829						0.222
CIN-5	Area															3360											10465			10320		20367
	cg amount (µg)	0	0	0	0	0	0	0	0	0	0	0	0	0	0	0.205016	0	0	0	0	0	0	0	0	0	0	0.638538	0	0	0.629691	0	1.24272	0	0	0	0	2.71597		sum
	Card Conc (µg/g)	0	0	0	0	0	0	0	0	0	0	0	0	0	0	0.923493	0	0	0	0	0	0	0	0	0	0	2.8763	0	0	2.83644	0	5.59785	0	0	0	0	12.2341		12.2341
vial 20	time																										56.19
Digitoxin	Area																										2446195
	cg amount (µg)	0	0	0	0	0	0	0	0	0	0	0	0	0	0	0	0	0	0	0	0	0	0	0	0	0	149.258	0	0	0	0	0	0	0	0	0	149.258		sum
	Card Conc (µg/g)
vial 21	time											9.053												52.295	54.232		56.168			58.575		60.738			62.77			0.3324
CIN-6	Area											4055												1137	563		3780			4891		4723			3943
	cg amount (µg)	0	0	0	0	0	0	0	0	0	0	0.247422	0	0	0	0	0	0	0	0	0	0	0	0.0693758	0.0343523	0	0.230642	0	0	0.298432	0	0.288181	0	0	0.240588	0	1.40899		sum
	Card Conc (µg/g)	0	0	0	0	0	0	0	0	0	0	0.74435	0	0	0	0	0	0	0	0	0	0	0	0.208712	0.103346	0	0.69387	0	0	0.897809	0	0.866971	0	0	0.723791	0	4.23885		4.23885
vial 22	time															14.78											56.126		57.434			60.719	61.596	61.93	62.443			0.28023
SM-1	Area															11387											1078		2656			6514	13910	2425	1815
	cg amount (µg)	0	0	0	0	0	0	0	0	0	0	0	0	0	0	0.694795	0	0	0	0	0	0	0	0	0	0	0.0657758	0	0.16206	0	0	0.397462	0.84874	0.147965	0.110745	0	2.42754		sum
	Card Conc (µg/g)	0	0	0	0	0	0	0	0	0	0	0	0	0	0	2.47937	0	0	0	0	0	0	0	0	0	0	0.234721	0	0.57831	0	0	1.41834	3.02873	0.528013	0.395193	0	8.66268		8.66268
vial 23	time														13.184	14.797											56.157	56.656		58.587			61.609					0.25136
SM-2	Area														7744	15945											3627	528		730			24354
	cg amount (µg)	0	0	0	0	0	0	0	0	0	0	0	0	0	0.472512	0.972909	0	0	0	0	0	0	0	0	0	0	0.221307	0.0322167	0	0.0445421	0	0	1.486	0	0	0	3.22948		sum
	Card Conc (µg/g)	0	0	0	0	0	0	0	0	0	0	0	0	0	1.87982	3.87058	0	0	0	0	0	0	0	0	0	0	0.880438	0.12817	0	0.177204	0	0	5.91183	0	0	0	12.848		12.848
vial 24	time										8.691						21.674		40.4								56.159								62.387			0.5009
SM-3	Area										4253						1615		9631								18183								2435
	cg amount (µg)	0	0	0	0	0	0	0	0	0	0.259503	0	0	0	0	0	0.0985417	0	0.58765	0	0	0	0	0	0	0	1.10946	0	0	0	0	0	0	0	0.148575	0	2.20373		sum
	Card Conc (µg/g)	0	0	0	0	0	0	0	0	0	0.518074	0	0	0	0	0	0.196729	0	1.17319	0	0	0	0	0	0	0	2.21494	0	0	0	0	0	0	0	0.296617	0	4.39955		4.39955
vial 25	time														13.204	14.832			40.432								56.21				60.193	60.754						0.33963
SM-4	Area														6277	6724			1991								6379				2767	7567
	cg amount (µg)	0	0	0	0	0	0	0	0	0	0	0	0	0	0.383001	0.410275	0	0	0.121484	0	0	0	0	0	0	0	0.389224	0	0	0	0.168833	0.461712	0	0	0	0	1.93453		sum
	Card Conc (µg/g)	0	0	0	0	0	0	0	0	0	0	0	0	0	1.1277	1.20801	0	0	0.357695	0	0	0	0	0	0	0	1.14602	0	0	0	0.497108	1.35946	0	0	0	0	5.69599		5.69599
vial 26	time											9.118			13.28	14.865			39.435	44.322	45.746				53.412													0.45274
SM-5	Area											46229			12593	146934			2968	7443	8061				2568
	cg amount (µg)	0	0	0	0	0	0	0	0	0	0	2.82073	0	0	0.768381	8.9654	0	0	0.181097	0.454146	0.491854	0	0	0	0.15669	0	0	0	0	0	0	0	0	0	0	0	13.8383		sum
	Card Conc (µg/g)	0	0	0	0	0	0	0	0	0	0	6.23036	0	0	1.69718	19.8025	0	0	0.400002	1.00311	1.08639	0	0	0	0.346094	0	0	0	0	0	0	0	0	0	0	0	30.5657		30.5657
vial 27	time											9.127				14.874			40.581		45.847			51.31			56.259									63.596		0.44159
SM-6	Area											13864				15660			2964		5510			26431			5408									10787
	cg amount (µg)	0	0	0	0	0	0	0	0	0	0	0.845933	0	0	0	0.955519	0	0	0.180853	0	0.336201	0	0	1.61273	0	0	0.329977	0	0	0	0	0	0	0	0	0.658185	4.9194		sum
	Card Conc (µg/g)	0	0	0	0	0	0	0	0	0	0	1.91565	0	0	0	2.16381	0	0	0.40955	0	0.761342	0	0	3.65209	0	0	0.747248	0	0	0	0	0	0	0	0	1.49049	11.1402		11.1402
vial 28	time			2.18		3.038	3.6					9.187		11.033					40.631	44.57				52.46			56.273				60.368							0.14096
TUB-1	Area			1323480		8504	135691					19329		18089					4257	6029				10842			8566				50429
	cg amount (µg)	0	0	80.7542	0	0.518885	8.27939	0	0	0	0	1.17939	0	1.10373	0	0	0	0	0.259747	0.367869	0	0	0	0.661541	0	0	0.522668	0	0	0	3.077	0	0	0	0	0	96.7244		sum
	Card Conc (µg/g)	0	0	572.887	0	3.68108	58.7358	0	0	0	0	8.36683	0	7.83008	0	0	0	0	1.8427	2.60974	0	0	0	4.69311	0	0	3.70791	0	0	0	21.8289	0	0	0	0	0	686.183		686.183
vial 29	time			2.156			3.542	4.588				9.125		10.951										52.437														0.10317
TUB-2	Area			381193			136308	1879				39136		37709										12894
	cg amount (µg)	0	0	23.2591	0	0	8.31704	0.11465	0	0	0	2.38794	0	2.30087	0	0	0	0	0	0	0	0	0	0.786747	0	0	0	0	0	0	0	0	0	0	0	0	37.1663		sum
	Card Conc (µg/g)	0	0	225.444	0	0	80.6149	1.11127	0	0	0	23.1457	0	22.3018	0	0	0	0	0	0	0	0	0	7.62574	0	0	0	0	0	0	0	0	0	0	0	0	360.244		360.244
vial 30	time																										56.238
Digitoxin	Area																										3408277
	cg amount (µg)	0	0	0	0	0	0	0	0	0	0	0	0	0	0	0	0	0	0	0	0	0	0	0	0	0	207.961	0	0	0	0	0	0	0	0	0	207.961		sum
	Card Conc (µg/g)
vial 31	time			2.144			3.528				8.733	9.104		10.11										52.367			56.207											0.29214
TUB-3	Area			607685			244023				1749	26078		1781										8390			11634
	cg amount (µg)	0	0	37.0788	0	0	14.8894	0	0	0	0.106718	1.59119	0	0.10867	0	0	0	0	0	0	0	0	0	0.511929	0	0	0.709866	0	0	0	0	0	0	0	0	0	54.9966		sum
	Card Conc (µg/g)	0	0	126.921	0	0	50.9668	0	0	0	0.365297	5.44667	0	0.371981	0	0	0	0	0	0	0	0	0	1.75234	0	0	2.42988	0	0	0	0	0	0	0	0	0	188.254		188.254
vial 32	time			2.149	2.922	3.164	3.537	4.588			8.729	9.1			13.213									52.369			56.223						61.161					0.16116
TUB-4	Area			504508	2550	5072	526261	2562			654	30809			484480									17234			7917						191915
	cg amount (µg)	0	0	30.7833	0.155592	0.309476	32.1106	0.156324	0	0	0.0399048	1.87986	0	0	29.5613	0	0	0	0	0	0	0	0	1.05156	0	0	0.483068	0	0	0	0	0	11.71	0	0	0	108.241		sum
	Card Conc (µg/g)	0	0	191.011	0.965451	1.9203	199.247	0.969995	0	0	0.24761	11.6645	0	0	183.428	0	0	0	0	0	0	0	0	6.52494	0	0	2.99744	0	0	0	0	0	72.6606	0	0	0	671.637		671.637
vial 33	time			2.157		3.138	3.507				8.739	9.125		10.926					40.605					52.394			56.261				59.536							0.22169
TUB-5	Area			736602		1259	36142				2583	18744		11328					9400					7829			14322				16481
	cg amount (µg)	0	0	44.9449	0	0.0768198	2.20526	0	0	0	0.157606	1.14369	0	0.691195	0	0	0	0	0.573555	0	0	0	0	0.477698	0	0	0.873879	0	0	0	1.00561	0	0	0	0	0	52.1502		sum
	Card Conc (µg/g)	0	0	202.738	0	0.346519	9.94749	0	0	0	0.710928	5.15898	0	3.11785	0	0	0	0	2.5872	0	0	0	0	2.1548	0	0	3.9419	0	0	0	4.53612	0	0	0	0	0	235.239		235.239
vial 34	time			2.17			3.531				8.759	9.153		11.012										52.398			56.284											0.42285
TUB-6	Area			1203964			158144				672	31259		57161										10851			5662
	cg amount (µg)	0	0	73.4617	0	0	9.6494	0	0	0	0.0410031	1.90732	0	3.48777	0	0	0	0	0	0	0	0	0	0.66209	0	0	0.345476	0	0	0	0	0	0	0	0	0	89.5548		sum
	Card Conc (µg/g)	0	0	173.73	0	0	22.8199	0	0	0	0.0969684	4.51062	0	8.24823	0	0	0	0	0	0	0	0	0	1.56578	0	0	0.817017	0	0	0	0	0	0	0	0	0	211.788		211.788
vial 35	time		1.903	2.162			3.535					9.137		11.004							45.362			52.409	53.45		56.28											0.28091
BB-1	Area		35100	2249391			264007					22635		17717							2806			4192	1157		7743
	cg amount (µg)	0	2.14168	137.25	0	0	16.1088	0	0	0	0	1.38111	0	1.08103	0	0	0	0	0	0	0.171212	0	0	0.255781	0.0705961	0	0.472451	0	0	0	0	0	0	0	0	0	158.933		sum
	Card Conc (µg/g)	0	7.62408	488.591	0	0	57.345	0	0	0	0	4.91655	0	3.84831	0	0	0	0	0	0	0.609492	0	0	0.910545	0.251312	0	1.68186	0	0	0	0	0	0	0	0	0	565.778		565.778
vial 36	time		1.949	2.183			3.545							10.996	13.323									52.373			56.301				59.567	59.879						0.23245
BB-2	Area		9466	2393260			134466							6844	3860									2932			1252				10107	10914
	cg amount (µg)	0	0.577582	146.028	0	0	8.20465	0	0	0	0	0	0	0.417597	0.235524	0	0	0	0	0	0	0	0	0.1789	0	0	0.0763927	0	0	0	0.616694	0.665934	0	0	0	0	157.002		sum
	Card Conc (µg/g)	0	2.48476	628.214	0	0	35.2964	0	0	0	0	0	0	1.7965	1.01322	0	0	0	0	0	0	0	0	0.76963	0	0	0.328641	0	0	0	2.65302	2.86485	0	0	0	0	675.421		675.421
vial 37	time		1.927	2.285			3.409																				56.311											0.26281
BB-3	Area		52258	1777			5492																				3923
	cg amount (µg)	0	3.1886	0.108426	0	0	0.335103	0	0	0	0	0	0	0	0	0	0	0	0	0	0	0	0	0	0	0	0.239368	0	0	0	0	0	0	0	0	0	3.8715		sum
	Card Conc (µg/g)	0	12.1327	0.412566	0	0	1.27508	0	0	0	0	0	0	0	0	0	0	0	0	0	0	0	0	0	0	0	0.910802	0	0	0	0	0	0	0	0	0	14.7312		14.7312
vial 38	time		1.901	2.163			3.533					9.168		10.965	13.296						45.366			52.452			56.301											0.25075
BB-4	Area		35480	3285365			203321					21717		14624	1867						5976			4725			2199
	cg amount (µg)	0	2.16487	200.462	0	0	12.4059	0	0	0	0	1.3251	0	0.892306	0.113918	0	0	0	0	0	0.364635	0	0	0.288303	0	0	0.134175	0	0	0	0	0	0	0	0	0	218.151		sum
	Card Conc (µg/g)	0	8.63356	799.448	0	0	49.4753	0	0	0	0	5.28453	0	3.55855	0.454309	0	0	0	0	0	1.45418	0	0	1.14976	0	0	0.535096	0	0	0	0	0	0	0	0	0	869.993		869.993
vial 39	time			2.157			3.524					9.137		10.968	13.289					44.705				52.451			56.32											0.34775
BB-5	Area			1671087			96535					14720		13802	3160					3666				1870			905
	cg amount (µg)	0	0	101.964	0	0	5.89023	0	0	0	0	0.898163	0	0.84215	0.192812	0	0	0	0	0.223687	0	0	0	0.114101	0	0	0.05522	0	0	0	0	0	0	0	0	0	110.18		sum
	Card Conc (µg/g)	0	0	293.21	0	0	16.9381	0	0	0	0	2.58278	0	2.42171	0.554456	0	0	0	0	0.64324	0	0	0	0.328112	0	0	0.158792	0	0	0	0	0	0	0	0	0	316.838		316.838
vial 40	time																										56.241
Digitoxin	Area																										2219839
	cg amount (µg)	0	0	0	0	0	0	0	0	0	0	0	0	0	0	0	0	0	0	0	0	0	0	0	0	0	135.447	0	0	0	0	0	0	0	0	0	135.447		sum
	Card Conc (µg/g)
vial 41	time			2.158			3.535	4.638				9.111		10.939				37.155						52.407			56.289				59.55							0.05704
HY-1	Area			950158			795233	4958				28722		31325				3475						12265			3311				11841
	cg amount (µg)	0	0	57.9753	0	0	48.5224	0.30252	0	0	0	1.75252	0	1.91134	0	0	0	0.212032	0	0	0	0	0	0.748368	0	0	0.202026	0	0	0	0.722497	0	0	0	0	0	112.349		sum
	Card Conc (µg/g)	0	0	1016.4	0	0	850.672	5.30365	0	0	0	30.7243	0	33.5088	0	0	0	3.71726	0	0	0	0	0	13.1201	0	0	3.54183	0	0	0	12.6665	0	0	0	0	0	1969.65		1969.65
vial 42	time			2.16			3.527	4.685				9.108		10.958	13.857																							0.15438
HY-2	Area			145841			482101	5511				30729		33068	9009
	cg amount (µg)	0	0	8.89871	0	0	29.4161	0.336262	0	0	0	1.87498	0	2.01769	0.549698	0	0	0	0	0	0	0	0	0	0	0	0	0	0	0	0	0	0	0	0	0	43.0935		sum
	Card Conc (µg/g)	0	0	57.6416	0	0	190.544	2.17815	0	0	0	12.1452	0	13.0697	3.56068	0	0	0	0	0	0	0	0	0	0	0	0	0	0	0	0	0	0	0	0	0	279.139		279.139
vial 43	time			2.162		3.156	3.534	4.52			8.745	9.153		10.9					40.605					52.42			56.301					60.336						0.18821
HY-3	Area			295109		10653	433803	688			4681	10847		2953					4059					4000			10986					4555
	cg amount (µg)	0	0	18.0065	0	0.650009	26.4692	0.0419794	0	0	0.285618	0.661846	0	0.180182	0	0	0	0	0.247666	0	0	0	0	0.244066	0	0	0.670328	0	0	0	0	0.27793	0	0	0	0	47.7353		sum
	Card Conc (µg/g)	0	0	95.6725	0	3.45364	140.636	0.223045	0	0	1.51755	3.51653	0	0.957344	0	0	0	0	1.3159	0	0	0	0	1.29678	0	0	3.56159	0	0	0	0	1.4767	0	0	0	0	253.628		253.628
vial 44	time						3.527		5.209			9.143															56.299											0.08158
HY-4	Area						280480		7772			13819															6698
	cg amount (µg)	0	0	0	0	0	17.1139	0	0.47422	0	0	0.843187	0	0	0	0	0	0	0	0	0	0	0	0	0	0	0.408689	0	0	0	0	0	0	0	0	0	18.84		sum
	Card Conc (µg/g)	0	0	0	0	0	209.781	0	5.81295	0	0	10.3357	0	0	0	0	0	0	0	0	0	0	0	0	0	0	5.00967	0	0	0	0	0	0	0	0	0	230.939		230.939
vial 45	time			2.171			3.55	4.778				9.165								43.879				52.459			56.316											0.34235
HY-5	Area			203654			83653	16271				3971								6351				1761			3352
	cg amount (µg)	0	0	12.4263	0	0	5.10422	0.9928	0	0	0	0.242297	0	0	0	0	0	0	0	0.387516	0	0	0	0.10745	0	0	0.204527	0	0	0	0	0	0	0	0	0	19.4651		sum
	Card Conc (µg/g)	0	0	36.2969	0	0	14.9093	2.89996	0	0	0	0.707745	0	0	0	0	0	0	0	1.13193	0	0	0	0.31386	0	0	0.597422	0	0	0	0	0	0	0	0	0	56.8572		56.8572
vial 46	time			2.167			3.538	4.639				9.139	10.138	10.979										52.437			56.08			58.541								0.3188
HY-6	Area			465957			506345	2135				22550	3816	23322										6794			549			5761
	cg amount (µg)	0	0	28.4311	0	0	30.8954	0.13027	0	0	0	1.37592	0.232839	1.42303	0	0	0	0	0	0	0	0	0	0.414546	0	0	0.0334981	0	0	0.351516	0	0	0	0	0	0	63.2881		sum
	Card Conc (µg/g)	0	0	89.1816	0	0	96.9116	0.408627	0	0	0	4.31594	0.730361	4.4637	0	0	0	0	0	0	0	0	0	1.30033	0	0	0.105076	0	0	1.10262	0	0	0	0	0	0	198.52		198.52
vial 47	time			2.136			3.481	4.683	5.11		8.738	9.132		10.953			19.767			43.835	46.388																	0.13803
GB-1	Area			7075085			120753	23142	3704		1866	193571		92927			18852			30499	2075
	cg amount (µg)	0	0	431.697	0	0	7.36793	1.41204	0.226005	0	0.113857	11.811	0	5.67008	0	0	1.15028	0	0	1.86094	0.126609	0	0	0	0	0	0	0	0	0	0	0	0	0	0	0	461.436		sum
	Card Conc (µg/g)	0	0	3127.56	0	0	53.3792	10.23	1.63736	0	0.82487	85.5686	0	41.0786	0	0	8.33358	0	0	13.4822	0.917259	0	0	0	0	0	0	0	0	0	0	0	0	0	0	0	3343.01		3343.01
vial 48	time	1.329	1.912	2.171			3.395	4.942			8.957								40.785		47.01						56.302											0.17161
GB-2	Area	1498	64710	4641			7333	3980			9135								8157		1217						22150
	cg amount (µg)	0.0914028	3.94838	0.283178	0	0	0.447434	0.242846	0	0	0.557386	0	0	0	0	0	0	0	0.497712	0	0.0742571	0	0	0	0	0	1.35152	0	0	0	0	0	0	0	0	0	7.49411		sum
	Card Conc (µg/g)	0.532619	23.0079	1.65012	0	0	2.60727	1.4151	0	0	3.24798	0	0	0	0	0	0	0	2.90025	0	0.432709	0	0	0	0	0	7.87551	0	0	0	0	0	0	0	0	0	43.6694		43.6694
vial 49	time		1.907	2.163			3.537	4.622			8.477	9.133		10.978										52.421			56.314			58.538								0.14861
GB-3	Area		33942	813847			92210	1739			3435	24200		20760										7688			5783			1272
	cg amount (µg)	0	2.07102	49.6581	0	0	5.62633	0.106108	0	0	0.209592	1.4766	0	1.2667	0	0	0	0	0	0	0	0	0	0.469095	0	0	0.352859	0	0	0.077613	0	0	0	0	0	0	61.314		sum
	Card Conc (µg/g)	0	13.936	334.151	0	0	37.8597	0.714001	0	0	1.41035	9.93607	0	8.52367	0	0	0	0	0	0	0	0	0	3.15655	0	0	2.37439	0	0	0.52226	0	0	0	0	0	0	412.584		412.584
vial 50	time																										56.234
Digitoxin	Area																										2130687
	cg amount (µg)	0	0	0	0	0	0	0	0	0	0	0	0	0	0	0	0	0	0	0	0	0	0	0	0	0	130.007	0	0	0	0	0	0	0	0	0	130.007		sum
	Card Conc (µg/g)
vial 51	time		1.901	2.16							8.915								40.657					52.264			56.239											0.13152
GB-4	Area		3533	936							1305								2802					1757			5885
	cg amount (µg)	0	0.215571	0.0571115	0	0	0	0	0	0	0.0796266	0	0	0	0	0	0	0	0.170968	0	0	0	0	0.107206	0	0	0.359082	0	0	0	0	0	0	0	0	0	0.989566		sum
	Card Conc (µg/g)	0	1.63908	0.434242	0	0	0	0	0	0	0.605433	0	0	0	0	0	0	0	1.29994	0	0	0	0	0.815131	0	0	2.73025	0	0	0	0	0	0	0	0	0	7.52407		7.52407
vial 52	time			2.17								9.141		10.945																								0.22764
GB-5	Area			182557								38428		16080
	cg amount (µg)	0	0	11.139	0	0	0	0	0	0	0	2.34474	0	0.981146	0	0	0	0	0	0	0	0	0	0	0	0	0	0	0	0	0	0	0	0	0	0	14.4649		sum
	Card Conc (µg/g)	0	0	48.9325	0	0	0	0	0	0	0	10.3002	0	4.31008	0	0	0	0	0	0	0	0	0	0	0	0	0	0	0	0	0	0	0	0	0	0	63.5428		63.5428
vial 53	time			2.176			3.555	4.684				9.143		10.968						42.927				52.397								60.346						0.3188
GB-6	Area			838815			195487	13960				78207		30752						3319				8466								63211
	cg amount (µg)	0	0	51.1816	0	0	11.9279	0.851791	0	0	0	4.77192	0	1.87638	0	0	0	0	0	0.202514	0	0	0	0.516566	0	0	0	0	0	0	0	3.85692	0	0	0	0	75.1856		sum
	Card Conc (µg/g)	0	0	160.544	0	0	37.4151	2.67187	0	0	0	14.9684	0	5.88576	0	0	0	0	0	0.635238	0	0	0	1.62034	0	0	0	0	0	0	0	12.0982	0	0	0	0	235.839		235.839

## Sheet: latex
MW	rep	trt	wgt gain plant 1 mg	wg 2	wg 3	wg 4	Average
A. incarnata	1	1	1	1.1	1.6	m	1.23333
A. incarnata	2	1	1.5	1.3	1.4	1.2	1.35
A. incarnata	3	1	1.3	3.5	1.7	2.4	2.225
A. incarnata	4	1	0.5	0.4	1.4	1	0.825
A. incarnata	5	1	0.7	2.2	1.7	0.9	1.375
A. incarnata	6	1	2.7	0.8	0.5	1.2	1.3
Cinderalla	1	2	1.8	5.6	5.3	1.6	3.575
Cinderalla	2	2	10.2	2.8	12.4	1.9	6.825
Cinderalla	3	2	4.3	3.7	1.2	3.7	3.225
Cinderalla	4	2	0.1	1.2	0.4	2.5	1.05
Cinderalla	5	2	6	1.3	1.7	4.4	3.35
Cinderalla	6	2	1.2	2.7	3.7	1.2	2.2
Ice Ballet	1	3	0.2	1.8	1.5	0.9	1.1
Ice Ballet	2	3	3	1	1.1	0.8	1.475
Ice Ballet	3	3	0.9	0.8	2.2	2.3	1.55
Ice Ballet	4	3	1	0.9	1.1	1.1	1.025
Ice Ballet	5	3	0.9	0.2	0.9	0.1	0.525
Ice Ballet	6	3	0.3	m	1	0.9	0.733333
Soulmate	1	4	0.9	3.3	1.3	1.8	1.825
Soulmate	2	4	0.4	0.3	0.2	0.1	0.25
Soulmate	3	4	0.8	1.7	1	0.8	1.075
Soulmate	4	4	1.5	2.4	0.3	1.8	1.5
Soulmate	5	4	0.4	1.8	1	0.8	1
Soulmate	6	4	1.2	1.2	0.9	1.3	1.15
A. tuberosa	1	5	0.4	0.6	0.5	1	0.625
A. tuberosa	2	5	0.6	0.2	0.3	0.6	0.425
A. tuberosa	3	5	1.1	0.5	0.5	1	0.775
A. tuberosa	4	5	0.2	0.4	0.3	0.2	0.275
A. tuberosa	5	5	1.5	0.2	1.2	0.6	0.875
A. tuberosa	6	5	3.1	0.5	0.9	1.3	1.45
Gay butterflies	1	6	6.1	2.7	3.2	1.1	3.275
Gay butterflies	2	6	1.2	2.6	1.9	2.8	2.125
Gay butterflies	3	6	1.4	1.5	1.7	1.4	1.5
Gay butterflies	4	6	3.3	0.8	1.7	2.2	2
Gay butterflies	5	6	0.7	1	0.4	0.5	0.65
Gay butterflies	6	6	2.5	1.6	2.6	6	3.175
Hello Yellow	1	7	2	0.9	1.2	0.7	1.2
Hello Yellow	2	7	2.7	5.7	2.5	2.4	3.325
Hello Yellow	3	7	2.3	2.1	3.5	1.8	2.425
Hello Yellow	4	7	3.6	1.9	0.7	1.7	1.975
Hello Yellow	5	7	2.2	3.8	1.9	1.7	2.4
Hello Yellow	6	7	2.3	3.3	1.6	2.6	2.45

## Sheet: trichomes
MW	rep	trt	leaf 1	leaf 2	leaf 3	leaf 4	Average
A. incarnata	1	1	31	65	19	105	55
A. incarnata	2	1	129	15	53	75	68
A. incarnata	3	1	191	52	142	134	129.75
A. incarnata	4	1	127	125	89	125	116.5
A. incarnata	5	1	105	91	11	41	62
A. incarnata	6	1	60	191	265	74	147.5
Cinderalla	1	2	65	68	30	32	48.75
Cinderalla	2	2	37	64	55	158	78.5
Cinderalla	3	2	87	139	86	190	125.5
Cinderalla	4	2	100	64	100	163	106.75
Cinderalla	5	2	17	38	26	31	28
Cinderalla	6	2	150	56	237	247	172.5
Ice Ballet	1	3	105	113	49	108	93.75
Ice Ballet	2	3	97	96	179	73	111.25
Ice Ballet	3	3	225	210	228	217	220
Ice Ballet	4	3	282	137	102	142	165.75
Ice Ballet	5	3	141	30	161	80	103
Ice Ballet	6	3	94	121	43	113	92.75
Soulmate	1	4	19	11	26	12	17
Soulmate	2	4	43	55	52	38	47
Soulmate	3	4	235	243	110	138	181.5
Soulmate	4	4	108	126	178	89	125.25
Soulmate	5	4	168	34	38	21	65.25
Soulmate	6	4	130	122	44	157	113.25
A. tuberosa	1	5	128	169	112	76	121.25
A. tuberosa	2	5	268	257	216	230	242.75
A. tuberosa	3	5	318	159	112	192	195.25
A. tuberosa	4	5	312	171	308	217	252
A. tuberosa	5	5	233	147	264	204	212
A. tuberosa	6	5	201	186	440	179	251.5
Gay butterflies	1	6	171	108	45	313	159.25
Gay butterflies	2	6	421	367	58	136	245.5
Gay butterflies	3	6	65	143	373	81	165.5
Gay butterflies	4	6	331	438	292	271	333
Gay butterflies	5	6	97	90	394	111	173
Gay butterflies	6	6	179	202	60	97	134.5
Hello Yellow	1	7	150	31	61	121	90.75
Hello Yellow	2	7	336	258	297	300	297.75
Hello Yellow	3	7	88	343	121	275	206.75
Hello Yellow	4	7	153	243	175	151	180.5
Hello Yellow	5	7	76	108	81	102	91.75
Hello Yellow	6	7	41	56	41	74	53

## Sheet: Larval counts 
Species	cultivar	date	rep	eggs and larvae
A. incarnata		2018-06-14	1	0
A. incarnata	Cinderella	2018-06-14	1	0
A. incarnata	Ice ballet	2018-06-14	1	0
A. incarnata	Soulmate	2018-06-14	1	0
A. tuberosa		2018-06-14	1	0
A. tuberosa	Gay butterflies	2018-06-14	1	0
A. tuberosa	Hello Yellow	2018-06-14	1	0
A. tuberosa	Blonde Bombshell	2018-06-14	1	0
A. incarnata		2018-06-14	2	0
A. incarnata	Cinderella	2018-06-14	2	0
A. incarnata	Ice ballet	2018-06-14	2	0
A. incarnata	Soulmate	2018-06-14	2	0
A. tuberosa		2018-06-14	2	0
A. tuberosa	Gay butterflies	2018-06-14	2	0
A. tuberosa	Hello Yellow	2018-06-14	2	0
A. tuberosa	Blonde Bombshell	2018-06-14	2	0
A. incarnata		2018-06-14	3	0
A. incarnata	Cinderella	2018-06-14	3	0
A. incarnata	Ice ballet	2018-06-14	3	0
A. incarnata	Soulmate	2018-06-14	3	0
A. tuberosa		2018-06-14	3	0
A. tuberosa	Gay butterflies	2018-06-14	3	0
A. tuberosa	Hello Yellow	2018-06-14	3	0
A. tuberosa	Blonde Bombshell	2018-06-14	3	0
A. incarnata		2018-06-14	4	0
A. incarnata	Cinderella	2018-06-14	4	0
A. incarnata	Ice ballet	2018-06-14	4	0
A. incarnata	Soulmate	2018-06-14	4	0
A. tuberosa		2018-06-14	4	0
A. tuberosa	Gay butterflies	2018-06-14	4	0
A. tuberosa	Hello Yellow	2018-06-14	4	0
A. tuberosa	Blonde Bombshell	2018-06-14	4	0
A. incarnata		2018-06-14	5	0
A. incarnata	Cinderella	2018-06-14	5	0
A. incarnata	Ice ballet	2018-06-14	5	0
A. incarnata	Soulmate	2018-06-14	5	0
A. tuberosa		2018-06-14	5	0
A. tuberosa	Gay butterflies	2018-06-14	5	0
A. tuberosa	Hello Yellow	2018-06-14	5	0
A. tuberosa	Blonde Bombshell	2018-06-14	5	0
A. incarnata		2018-06-14	6	0
A. incarnata	Cinderella	2018-06-14	6	0
A. incarnata	Ice ballet	2018-06-14	6	0
A. incarnata	Soulmate	2018-06-14	6	0
A. tuberosa		2018-06-14	6	0
A. tuberosa	Gay butterflies	2018-06-14	6	0
A. tuberosa	Hello Yellow	2018-06-14	6	0
A. tuberosa	Blonde Bombshell	2018-06-14	6	0
Species	cultivar	date	rep	eggs and larvae
A. incarnata		2018-06-28	1	6
A. incarnata	Cinderella	2018-06-28	1	12
A. incarnata	Ice ballet	2018-06-28	1	9
A. incarnata	Soulmate	2018-06-28	1	4
A. tuberosa		2018-06-28	1	0
A. tuberosa	Gay butterflies	2018-06-28	1	1
A. tuberosa	Hello Yellow	2018-06-28	1	1
A. tuberosa	Blonde Bombshell	2018-06-28	1	0
A. incarnata		2018-06-28	2	0
A. incarnata	Cinderella	2018-06-28	2	1
A. incarnata	Ice ballet	2018-06-28	2	1
A. incarnata	Soulmate	2018-06-28	2	1
A. tuberosa		2018-06-28	2	0
A. tuberosa	Gay butterflies	2018-06-28	2	1
A. tuberosa	Hello Yellow	2018-06-28	2	0
A. tuberosa	Blonde Bombshell	2018-06-28	2	0
A. incarnata		2018-06-28	3	0
A. incarnata	Cinderella	2018-06-28	3	0
A. incarnata	Ice ballet	2018-06-28	3	0
A. incarnata	Soulmate	2018-06-28	3	0
A. tuberosa		2018-06-28	3	0
A. tuberosa	Gay butterflies	2018-06-28	3	0
A. tuberosa	Hello Yellow	2018-06-28	3	0
A. tuberosa	Blonde Bombshell	2018-06-28	3	0
A. incarnata		2018-06-28	4	0
A. incarnata	Cinderella	2018-06-28	4	3
A. incarnata	Ice ballet	2018-06-28	4	0
A. incarnata	Soulmate	2018-06-28	4	0
A. tuberosa		2018-06-28	4	0
A. tuberosa	Gay butterflies	2018-06-28	4	0
A. tuberosa	Hello Yellow	2018-06-28	4	0
A. tuberosa	Blonde Bombshell	2018-06-28	4	0
A. incarnata		2018-06-28	5	3
A. incarnata	Cinderella	2018-06-28	5	1
A. incarnata	Ice ballet	2018-06-28	5	0
A. incarnata	Soulmate	2018-06-28	5	1
A. tuberosa		2018-06-28	5	0
A. tuberosa	Gay butterflies	2018-06-28	5	0
A. tuberosa	Hello Yellow	2018-06-28	5	0
A. tuberosa	Blonde Bombshell	2018-06-28	5	0
A. incarnata		2018-06-28	6	0
A. incarnata	Cinderella	2018-06-28	6	0
A. incarnata	Ice ballet	2018-06-28	6	0
A. incarnata	Soulmate	2018-06-28	6	0
A. tuberosa		2018-06-28	6	0
A. tuberosa	Gay butterflies	2018-06-28	6	2
A. tuberosa	Hello Yellow	2018-06-28	6	0
A. tuberosa	Blonde Bombshell	2018-06-28	6	0
		date	rep	eggs and larave
Species	cultivar	July week 2	1
A. incarnata		July week 2	1	2
A. incarnata	Cinderella	July week 2	1	3
A. incarnata	Ice ballet	July week 2	1	1
A. incarnata	Soulmate	July week 2	1	0
A. tuberosa		July week 2	1	0
A. tuberosa	Gay butterflies	July week 2	1	0
A. tuberosa	Hello Yellow	July week 2	1	1
A. tuberosa	Blonde Bombshell	July week 2	2	0
A. incarnata		July week 2	2	1
A. incarnata	Cinderella	July week 2	2	2
A. incarnata	Ice ballet	July week 2	2	2
A. incarnata	Soulmate	July week 2	2	1
A. tuberosa		July week 2	2	1
A. tuberosa	Gay butterflies	July week 2	2	0
A. tuberosa	Hello Yellow	July week 2	2	1
A. tuberosa	Blonde Bombshell	July week 2	3	0
A. incarnata		July week 2	3	0
A. incarnata	Cinderella	July week 2	3	0
A. incarnata	Ice ballet	July week 2	3	2
A. incarnata	Soulmate	July week 2	3	0
A. tuberosa		July week 2	3	1
A. tuberosa	Gay butterflies	July week 2	3	0
A. tuberosa	Hello Yellow	July week 2	3	0
A. tuberosa	Blonde Bombshell	July week 2	4	0
A. incarnata		July week 2	4	1
A. incarnata	Cinderella	July week 2	4	4
A. incarnata	Ice ballet	July week 2	4	0
A. incarnata	Soulmate	July week 2	4	0
A. tuberosa		July week 2	4	0
A. tuberosa	Gay butterflies	July week 2	4	0
A. tuberosa	Hello Yellow	July week 2	4	0
A. tuberosa	Blonde Bombshell	July week 2	5	0
A. incarnata		July week 2	5	2
A. incarnata	Cinderella	July week 2	5	1
A. incarnata	Ice ballet	July week 2	5	0
A. incarnata	Soulmate	July week 2	5	1
A. tuberosa		July week 2	5	0
A. tuberosa	Gay butterflies	July week 2	5	0
A. tuberosa	Hello Yellow	July week 2	5	0
A. tuberosa	Blonde Bombshell	July week 2	6	0
A. incarnata		July week 2	6	0
A. incarnata	Cinderella	July week 2	6	0
A. incarnata	Ice ballet	July week 2	6	2
A. incarnata	Soulmate	July week 2	6	0
A. tuberosa		July week 2	6	1
A. tuberosa	Gay butterflies	July week 2	6	1
A. tuberosa	Hello Yellow	July week 2	6	0
A. tuberosa	Blonde Bombshell	July week 2		0
Species	cultivar	date	rep	eggs and larvae
A. incarnata		July week 4	1	1
A. incarnata	Cinderella	July week 4	1	0
A. incarnata	Ice ballet	July week 4	1	1
A. incarnata	Soulmate	July week 4	1	3
A. tuberosa		July week 4	1	3
A. tuberosa	Gay butterflies	July week 4	1	0
A. tuberosa	Hello Yellow	July week 4	1	0
A. tuberosa	Blonde Bombshell	July week 4	1	0
A. incarnata		July week 4	2	2
A. incarnata	Cinderella	July week 4	2	6
A. incarnata	Ice ballet	July week 4	2	5
A. incarnata	Soulmate	July week 4	2	3
A. tuberosa		July week 4	2	2
A. tuberosa	Gay butterflies	July week 4	2	0
A. tuberosa	Hello Yellow	July week 4	2	1
A. tuberosa	Blonde Bombshell	July week 4	2	0
A. incarnata		July week 4	3	0
A. incarnata	Cinderella	July week 4	3	0
A. incarnata	Ice ballet	July week 4	3	1
A. incarnata	Soulmate	July week 4	3	4
A. tuberosa		July week 4	3	0
A. tuberosa	Gay butterflies	July week 4	3	1
A. tuberosa	Hello Yellow	July week 4	3	0
A. tuberosa	Blonde Bombshell	July week 4	3	0
A. incarnata		July week 4	4	0
A. incarnata	Cinderella	July week 4	4	0
A. incarnata	Ice ballet	July week 4	4	0
A. incarnata	Soulmate	July week 4	4	1
A. tuberosa		July week 4	4	0
A. tuberosa	Gay butterflies	July week 4	4	0
A. tuberosa	Hello Yellow	July week 4	4	0
A. tuberosa	Blonde Bombshell	July week 4	4	0
A. incarnata		July week 4	5	0
A. incarnata	Cinderella	July week 4	5	1
A. incarnata	Ice ballet	July week 4	5	0
A. incarnata	Soulmate	July week 4	5	2
A. tuberosa		July week 4	5	0
A. tuberosa	Gay butterflies	July week 4	5	0
A. tuberosa	Hello Yellow	July week 4	5	0
A. tuberosa	Blonde Bombshell	July week 4	5	2
A. incarnata		July week 4	6	1
A. incarnata	Cinderella	July week 4	6	1
A. incarnata	Ice ballet	July week 4	6	1
A. incarnata	Soulmate	July week 4	6	0
A. tuberosa		July week 4	6	0
A. tuberosa	Gay butterflies	July week 4	6	0
A. tuberosa	Hello Yellow	July week 4	6	0
A. tuberosa	Blonde Bombshell	July week 4	6	1
Species	cultivar	date	rep	eggs and larave
A. incarnata		Aug wk 2	1	11
A. incarnata	Cinderella	Aug wk 2	1	9
A. incarnata	Ice ballet	Aug wk 2	1	5
A. incarnata	Soulmate	Aug wk 2	1	8
A. tuberosa		Aug wk 2	1	0
A. tuberosa	Gay butterflies	Aug wk 2	1	1
A. tuberosa	Hello Yellow	Aug wk 2	1	0
A. tuberosa	Blonde Bombshell	Aug wk 2	1	0
A. incarnata		Aug wk 2	2	4
A. incarnata	Cinderella	Aug wk 2	2	7
A. incarnata	Ice ballet	Aug wk 2	2	1
A. incarnata	Soulmate	Aug wk 2	2	7
A. tuberosa		Aug wk 2	2	1
A. tuberosa	Gay butterflies	Aug wk 2	2	2
A. tuberosa	Hello Yellow	Aug wk 2	2	1
A. tuberosa	Blonde Bombshell	Aug wk 2	2	0
A. incarnata		Aug wk 2	3	1
A. incarnata	Cinderella	Aug wk 2	3	1
A. incarnata	Ice ballet	Aug wk 2	3	3
A. incarnata	Soulmate	Aug wk 2	3	1
A. tuberosa		Aug wk 2	3	0
A. tuberosa	Gay butterflies	Aug wk 2	3	0
A. tuberosa	Hello Yellow	Aug wk 2	3	0
A. tuberosa	Blonde Bombshell	Aug wk 2	3	0
A. incarnata		Aug wk 2	4	0
A. incarnata	Cinderella	Aug wk 2	4	1
A. incarnata	Ice ballet	Aug wk 2	4	0
A. incarnata	Soulmate	Aug wk 2	4	0
A. tuberosa		Aug wk 2	4	0
A. tuberosa	Gay butterflies	Aug wk 2	4	0
A. tuberosa	Hello Yellow	Aug wk 2	4	0
A. tuberosa	Blonde Bombshell	Aug wk 2	4	0
A. incarnata		Aug wk 2	5	0
A. incarnata	Cinderella	Aug wk 2	5	1
A. incarnata	Ice ballet	Aug wk 2	5	0
A. incarnata	Soulmate	Aug wk 2	5	1
A. tuberosa		Aug wk 2	5	0
A. tuberosa	Gay butterflies	Aug wk 2	5	0
A. tuberosa	Hello Yellow	Aug wk 2	5	0
A. tuberosa	Blonde Bombshell	Aug wk 2	5	0
A. incarnata		Aug wk 2	6	0
A. incarnata	Cinderella	Aug wk 2	6	0
A. incarnata	Ice ballet	Aug wk 2	6	0
A. incarnata	Soulmate	Aug wk 2	6	0
A. tuberosa		Aug wk 2	6	0
A. tuberosa	Gay butterflies	Aug wk 2	6	0
A. tuberosa	Hello Yellow	Aug wk 2	6	0
A. tuberosa	Blonde Bombshell	Aug wk 2	6	0
Species	cultivar	date	rep	eggs and larvae
A. incarnata	Incarnata	Aug wk 4	1	0
A. incarnata	Cinderella	Aug wk 4	1	1
A. incarnata	Ice ballet	Aug wk 4	1	4
A. incarnata	Soulmate	Aug wk 4	1	1
A. tuberosa	tuberosa	Aug wk 4	1	0
A. tuberosa	Gay butterflies	Aug wk 4	1	0
A. tuberosa	Hello Yellow	Aug wk 4	1	1
A. tuberosa	Blonde Bombshell	Aug wk 4	1	0
A. incarnata	incarnata	Aug wk 4	2	2
A. incarnata	Cinderella	Aug wk 4	2	2
A. incarnata	Ice ballet	Aug wk 4	2	2
A. incarnata	Soulmate	Aug wk 4	2	3
A. tuberosa	tuberosa	Aug wk 4	2	1
A. tuberosa	Gay butterflies	Aug wk 4	2	0
A. tuberosa	Hello Yellow	Aug wk 4	2	0
A. tuberosa	Blonde Bombshell	Aug wk 4	2	0
A. incarnata	incarnata	Aug wk 4	3	4
A. incarnata	Cinderella	Aug wk 4	3	4
A. incarnata	Ice ballet	Aug wk 4	3	2
A. incarnata	Soulmate	Aug wk 4	3	5
A. tuberosa	tuberosa	Aug wk 4	3	0
A. tuberosa	Gay butterflies	Aug wk 4	3	2
A. tuberosa	Hello Yellow	Aug wk 4	3	0
A. tuberosa	Blonde Bombshell	Aug wk 4	3	0
A. incarnata	Incarnata	Aug wk 4	4	2
A. incarnata	Cinderella	Aug wk 4	4	3
A. incarnata	Ice ballet	Aug wk 4	4	2
A. incarnata	Soulmate	Aug wk 4	4	1
A. tuberosa	tuberosa	Aug wk 4	4	0
A. tuberosa	Gay butterflies	Aug wk 4	4	0
A. tuberosa	Hello Yellow	Aug wk 4	4	0
A. tuberosa	Blonde Bombshell	Aug wk 4	4	0
A. incarnata	incarnata	Aug wk 4	5	0
A. incarnata	Cinderella	Aug wk 4	5	2
A. incarnata	Ice ballet	Aug wk 4	5	0
A. incarnata	Soulmate	Aug wk 4	5	0
A. tuberosa	tuberosa	Aug wk 4	5	0
A. tuberosa	Gay butterflies	Aug wk 4	5	0
A. tuberosa	Hello Yellow	Aug wk 4	5	0
A. tuberosa	Blonde Bombshell	Aug wk 4	5	0
A. incarnata	incarnata	Aug wk 4	6	3
A. incarnata	Cinderella	Aug wk 4	6	4
A. incarnata	Ice ballet	Aug wk 4	6	2
A. incarnata	Soulmate	Aug wk 4	6	4
A. tuberosa	tuberosa	Aug wk 4	6	0
A. tuberosa	Gay butterflies	Aug wk 4	6	0
A. tuberosa	Hello Yellow	Aug wk 4	6	1
A. tuberosa	Blonde Bombshell	Aug wk 4	6	0
2019
total	rep	trt
9	1	1
15	1	2
5	1	3
14	1	4
2	1	5
2	1	6
2	1	7
10	2	1
12	2	2
10	2	3
15	2	4
1	2	5
0	2	6
1	2	7
4	3	1
16	3	2
26	3	3
5	3	4
2	3	5
2	3	6
3	3	7
5	4	1
8	4	2
6	4	3
9	4	4
1	4	5
1	4	6
1	4	7
8	5	1
6	5	2
22	5	3
9	5	4
2	5	5
3	5	6
6	5	7
8	6	1
9	6	2
11	6	3
22	6	4
5	6	5
12	6	6
0	6	7

## Sheet: Bees
Species	cultivar	rep	Andrena	A. mellifera	B. bimaculatus	B. impatians	B. griscecollis	B. pensylavnicus	Ceratina spp.	X. virginica	Hylaeus spp.	Agepoestemon	augochlora	Augochlorella	Augochloropsis	Halictus	lasioglossum	Sphecodes	Anthidium	coeloxys	heriades	megachile	osmia
A. incarnata	Incarnata	1	0	6	0	0	10	0	0	10	0	0	0	0	0	0	4	0	0	0	0	0	0
A. incarnata	Cinderella	1	0	20	0	0	43	0	0	16	0	2	0	2	1	0	5	0	0	0	0	0	0
A. incarnata	Ice ballet	1	0	4	0	1	20	0	0	3	0	0	0	0	0	0	2	0	0	0	0	0	0
A. incarnata	Soulmate	1	0	10	0	0	38	0	0	9	0	0	0	2	2	0	2	0	0	0	0	0	0
A. tuberosa	tuberosa	1	0	5	1	1	5	0	2	0	0	0	1	0	1	0	9	0	0	1	0	6	0
A. tuberosa	Gay butterflies	1	0	16	1	8	17	0	0	0	0	1	1	2	4	0	25	0	0	1	0	7	0
A. tuberosa	Hello Yellow	1	0	9	3	0	16	0	0	1	0	0	0	0	1	0	2	0	0	0	0	0	0
A. tuberosa	Blonde Bombshell	1	0	0	0	0	1	0	0	0	3	0	3	1	1	3	54	0	0	0	0	0	0
A. incarnata	incarnata	2	0	3	0	0	43	0	0	14	0	0	0	0	0	0	2	0	0	0	0	0	0
A. incarnata	Cinderella	2	0	9	0	0	40	0	0	5	3	0	0	0	0	0	4	0	0	0	0	0	0
A. incarnata	Ice ballet	2	0	12	0	2	33	0	0	8	0	1	0	0	1	1	5	0	0	0	0	2	0
A. incarnata	Soulmate	2	0	4	0	0	3	0	0	12	2	1	1	0	3	0	9	0	0	1	0	0	0
A. tuberosa	tuberosa	2	0	7	2	0	6	0	0	4	0	0	1	0	2	0	8	0	2	0	4	0	0
A. tuberosa	Gay butterflies	2	0	23	0	3	30	0	0	0	0	1	3	2	1	0	9	0	0	0	0	2	0
A. tuberosa	Hello Yellow	2	0	6	1	4	17	0	1	0	0	0	0	1	0	0	6	0	0	0	0	1	0
A. tuberosa	Blonde Bombshell	2	0	11	0	1	3	0	0	0	0	0	2	0	1	2	25	0	0	0	0	0	0
A. incarnata	incarnata	3	0	1	0	0	23	0	0	11	0	0	0	0	0	0	2	0	0	0	0	0	0
A. incarnata	Cinderella	3	0	2	0	0	47	0	0	2	0	0	0	0	2	0	0	0	0	0	0	0	0
A. incarnata	Ice ballet	3	0	14	0	1	40	0	0	3	1	0	0	0	1	0	5	0	0	0	0	0	0
A. incarnata	Soulmate	3	0	9	0	0	10	0	0	11	1	0	0	0	1	0	3	0	0	0	0	0	0
A. tuberosa	tuberosa	3	0	6	1	0	6	0	0	0	0	0	2	0	3	2	8	0	2	3	0	4	0
A. tuberosa	Gay butterflies	3	0	12	0	3	18	0	2	0	0	1	3	3	1	2	18	0	0	1	0	4	0
A. tuberosa	Hello Yellow	3	0	2	0	5	6	0	1	0	0	0	0	0	0	0	10	0	1	2	1	2	0	8
A. tuberosa	Blonde Bombshell	3	0	10	0	0	1	0	0	0	0	0	2	0	0	3	24	0	0	0	0	0	0	5
A. incarnata	Incarnata	4	0	3	0	0	17	0	0	15	1	0	0	0	0	0	1	0	0	0	0	0	0	5
A. incarnata	Cinderella	4	1	8	0	1	29	0	0	20	0	0	0	2	3	0	3	0	0	0	0	0	0	7
A. incarnata	Ice ballet	4	0	2	0	1	16	0	0	6	0	0	0	0	2	0	3	0	0	0	0	0	0	5
A. incarnata	Soulmate	4	0	6	0	0	27	0	0	30	0	0	0	0	1	0	6	0	0	0	0	2	0	6
A. tuberosa	tuberosa	4	0	4	0	2	9	1	0	0	0	1	3	0	1	0	14	0	0	3	0	2	0	8
A. tuberosa	Gay butterflies	4	0	7	1	5	11	0	0	4	0	2	3	3	0	0	15	0	1	3	0	8	0	10
A. tuberosa	Hello Yellow	4	0	2	0	0	6	0	2	0	0	1	0	0	3	0	17	0	0	1	0	0	0	6
A. tuberosa	Blonde Bombshell	4	0	2	0	0	2	0	0	0	0	0	1	0	0	0	38	0	0	0	0	0	0	4
A. incarnata	incarnata	5	0	1	0	0	20	0	0	16	0	0	0	0	1	0	2	0	0	0	0	0	0	5
A. incarnata	Cinderella	5	0	11	4	0	33	0	0	22	0	0	0	0	0	0	4	0	0	0	0	0	0	4
A. incarnata	Ice ballet	5	0	8	0	0	25	0	0	5	1	0	0	0	2	2	6	0	0	0	0	1	0	8
A. incarnata	Soulmate	5	0	19	2	0	16	0	0	23	6	0	0	1	3	0	16	0	0	0	0	1	0	8
A. tuberosa	tuberosa	5	0	5	2	1	15	0	0	1	0	1	2	1	1	0	13	0	0	3	0	2	0	10
A. tuberosa	Gay butterflies	5	0	14	1	6	30	0	5	1	1	2	1	2	1	2	10	0	0	2	0	5	0	12
A. tuberosa	Hello Yellow	5	0	4	0	4	15	0	0	1	0	0	2	0	1	0	8	0	0	0	0	2	0	7
A. tuberosa	Blonde Bombshell	5	0	5	1	2	2	0	0	0	1	1	4	4	1	2	48	0	0	1	0	5	0	11
A. incarnata	incarnata	6	0	2	0	0	24	0	0	16	1	0	1	0	0	0	0	0	0	0	0	0	0	5
A. incarnata	Cinderella	6	0	10	8	0	21	0	0	15	0	0	0	0	0	2	4	0	0	0	0	0	0	5
A. incarnata	Ice ballet	6	0	7	0	0	31	0	0	7	0	0	0	0	3	0	2	1	0	0	0	0	0	6
A. incarnata	Soulmate	6	0	4	0	0	16	0	0	19	3	0	0	3	5	0	3	0	0	0	0	0	0	7
A. tuberosa	tuberosa	6	0	0	0	0	0	0	0	0	0	0	1	0	0	3	31	0	0	0	0	0	0	3
A. tuberosa	Gay butterflies	6	0	7	2	4	11	0	4	0	0	1	5	3	0	1	14	0	1	3	0	9	0	10
A. tuberosa	Hello Yellow	6	0	6	5	3	15	0	0	1	0	0	1	0	0	0	2	0	1	0	0	1	0	7
A. tuberosa	Blonde Bombshell	6	0	3	0	0	0	0	0	0	2	0	0	0	0	5	35	0	0	0	0	1	0	5

## Sheet: richness
Species	species	trt	trt	rep	richness
A. incarnata	1	Incarnata	1	1	4
A. incarnata	1	Cinderella	2	1	7
A. incarnata	1	Ice ballet	3	1	4
A. incarnata	1	Soulmate	4	1	6
A. tuberosa	2	tuberosa	5	1	8
A. tuberosa	2	Gay butterflies	6	1	9
A. tuberosa	2	Hello Yellow	7	1	5
A. tuberosa	2	Blonde Bombshell	8	1	7
A. incarnata	1	incarnata	1	2	4
A. incarnata	1	Cinderella	2	2	5
A. incarnata	1	Ice ballet	3	2	8
A. incarnata	1	Soulmate	4	2	9
A. tuberosa	2	tuberosa	5	2	8
A. tuberosa	2	Gay butterflies	6	2	8
A. tuberosa	2	Hello Yellow	7	2	6
A. tuberosa	2	Blonde Bombshell	8	2	6
A. incarnata	1	incarnata	1	3	4
A. incarnata	1	Cinderella	2	3	4
A. incarnata	1	Ice ballet	3	3	6
A. incarnata	1	Soulmate	4	3	6
A. tuberosa	2	tuberosa	5	3	9
A. tuberosa	2	Gay butterflies	6	3	11
A. tuberosa	2	Hello Yellow	7	3	8
A. tuberosa	2	Blonde Bombshell	8	3	5
A. incarnata	1	Incarnata	1	4	5
A. incarnata	1	Cinderella	2	4	7
A. incarnata	1	Ice ballet	3	4	5
A. incarnata	1	Soulmate	4	4	6
A. tuberosa	2	tuberosa	5	4	8
A. tuberosa	2	Gay butterflies	6	4	10
A. tuberosa	2	Hello Yellow	7	4	6
A. tuberosa	2	Blonde Bombshell	8	4	4
A. incarnata	1	incarnata	1	5	5
A. incarnata	1	Cinderella	2	5	4
A. incarnata	1	Ice ballet	3	5	8
A. incarnata	1	Soulmate	4	5	8
A. tuberosa	2	tuberosa	5	5	10
A. tuberosa	2	Gay butterflies	6	5	12
A. tuberosa	2	Hello Yellow	7	5	7
A. tuberosa	2	Blonde Bombshell	8	5	11
A. incarnata	1	incarnata	1	6	5
A. incarnata	1	Cinderella	2	6	5
A. incarnata	1	Ice ballet	3	6	6
A. incarnata	1	Soulmate	4	6	7
A. tuberosa	1	tuberosa	5	6	3
A. tuberosa	2	Gay butterflies	6	6	10
A. tuberosa	2	Hello Yellow	7	6	7
A. tuberosa	2	Blonde Bombshell	8	6	5

## Sheet: Rear tuberosa
Species/cultivar	rep	code	weight g	mg	instar	% survival
A. tuberosa	1	1	1.525	1525	5	90
A. tuberosa	2	1	1.645	1645	5
A. tuberosa	3	1	0.869	869	4
A. tuberosa	4	1	1.573	1573	5
A. tuberosa	5	1	0.752	752	4
A. tuberosa	6	1	1.381	1381	5
A. tuberosa	7	1	1.673	1673	5
A. tuberosa	8	1	0.366	366	4
A. tuberosa	9	1	0.317	317	4
A. tuberosa	10	1	m	m	m
Gay Butterflies	1	2	1.567	1567	5	80
Gay Butterflies	2	2	1.637	1637	5
Gay Butterflies	3	2	m	m	m
Gay Butterflies	4	2	m	m	m
Gay Butterflies	5	2	1.404	1404	5
Gay Butterflies	6	2	1.436	1436	5
Gay Butterflies	7	2	0.308	308	4
Gay Butterflies	8	2	1.042	1042	5
Gay Butterflies	9	2	1.112	1112	5
Gay Butterflies	10	2	0.895	895	4
Hello Yellow	1	3	0.902	902	5	100
Hello Yellow	2	3	0.767	767	4
Hello Yellow	3	3	0.979	979	5
Hello Yellow	4	3	0.842	842	4
Hello Yellow	5	3	0.698	698	4
Hello Yellow	6	3	0.357	357	4
Hello Yellow	7	3	0.595	595	4
Hello Yellow	8	3	0.859	859	4
Hello Yellow	9	3	0.417	417	4
Hello Yellow	10	3	0.971	971	5

## Sheet: Rear incarnata
Species/cultivar	rep	code	weight g		instar
A. incarnata	1	1	0.421	421	3
A. incarnata	2	1	1.001	1001	5
A. incarnata	3	1	0.374	374	4
A. incarnata	4	1	0.345	345	4
A. incarnata	5	1	0.64	640	4
A. incarnata	6	1	0.343	343	4
A. incarnata	7	1	0.261	261	3
A. incarnata	8	1	m	m	m
A. incarnata	9	1	0.281	281	3
A. incarnata	10	1	0.255	255	3
Cinderella	1	3	0.465	465	4
Cinderella	2	3	0.389	389	3
Cinderella	3	3	0.358	358	3
Cinderella	4	3	0.64	640	4
Cinderella	5	3	0.433	433	4
Cinderella	6	3	0.406	406	3
Cinderella	7	3	0.441	441	3
Cinderella	8	3	0.461	461	3
Cinderella	9	3	0.157	157	3
Cinderella	10	3	m	m	m
Ice ballet	1	2	0.52	520	4
Ice ballet	2	2	0.06	60	2
Ice ballet	3	2	0.493	493	4
Ice ballet	4	2	0.47	470	4
Ice ballet	5	2	0.393	393	4
Ice ballet	6	2	0.38	380	3
Ice ballet	7	2	0.278	278	3
Ice ballet	8	2	0.421	421	4
Ice ballet	9	2	0.47	470	4
Ice ballet	10	2	0.433	433	3
soulmate	1	4	0.538	538	5
soulmate	2	4	0.051	51	2
soulmate	3	4	0.4	400	4
soulmate	4	4	0.482	482	4
soulmate	5	4	0.394	394	3
soulmate	6	4	0.493	493	4
soulmate	7	4	0.547	547	4
soulmate	8	4	m	m	m
soulmate	9	4	0.445	445	3
soulmate	10	4	0.127	127	3

## Sheet: Plant stats
MW	rep	height cm	width 1	width 2	height cm	width 1	width 2	height cm	width 1	width 2	height cm	width 1	width 2	avg height	avg width
A. incarnata	1	88	72	45	100	80	60	m	m	m	101	82	90	96.3333	71.5
A. incarnata	2	105	120	91	111	77	91	116	105	93	104	102	60	109	92.375
A. incarnata	3	71	43	50	97	47	70	82	52	34	97	63	70	86.75	53.625
A. incarnata	4	94	80	70	89	74	60	m	m	m	m	m	m	91.5	71
A. incarnata	5	78	70	68	48	31	24	105	81	60	74	67	50	76.25	56.375
A. incarnata	6	89	89	84	m	m	m	76	83	71	58	40	42	74.3333	68.1667
Cinderalla	1	80	70	45	102	102	122	114	100	87	68	53	53	91	79
Cinderalla	2	77	75	72	87	64	57	91	106	82	76	37	24	82.75	64.625
Cinderalla	3	97	102	62	96	60	72	84	88	79	87	67	73	91	75.375
Cinderalla	4	93	97	80	100	74	77	m	m	m	m	m	m	96.5	82
Cinderalla	5	83	69	60	95	104	100	71	35	40	98	103	109	86.75	77.5
Cinderalla	6	103	75	82	90	90	84	97	103	80	102	87	108	98	88.625
Ice Ballet	1	74	65	69	86	97	50	74	70	89	m	m	m	78	73.3333
Ice Ballet	2	89	103	88	81	51	107	97	95	110	67	53	32	83.5	79.875
Ice Ballet	3	82	107	87	88	94	91	90	104	91	80	78	57	85	88.625
Ice Ballet	4	37	26	18	49	37	30	75	70	71	70	76	69	57.75	49.625
Ice Ballet	5	86	95	90	81	60	50	86	120	144	83	90	61	84	88.75
Ice Ballet	6	87	100	107	60	56	73	83	99	84	m	m	m	76.6667	86.5
Soulmate	1	88	57	52	110	126	130	110	99	73	111	141	145	104.75	102.875
Soulmate	2	106	96	95	92	104	77	96	105	92	m	m	m	98	94.8333
Soulmate	3	88	96	99	110	113	119	112	124	123	m	m	m	103.333	112.333
Soulmate	4	89	83	75	105	110	90	94	65	42	107	79	95	98.75	79.875
Soulmate	5	88	47	43	100	116	134	m	m	m	m	m	m	94	85
Soulmate	6	91	95	100	106	90	87	93	103	107	m	m	m	96.6667	97
A. tuberosa	1	27	36	22	34	45	31	40	51	57	22	35	28	30.75	38.125
A. tuberosa	2	22	33	17	31	38	30	46	50	40	25	36	31	31	34.375
A. tuberosa	3	33	36	32	47	62	44	33	29	45	28	43	24	35.25	39.375
A. tuberosa	4	54	52	30	25	38	27	23	33	25	33	39	33	33.75	34.625
A. tuberosa	5	31	45	32	30	37	32	29	45	30	38	51	45	32	39.625
A. tuberosa	6	30	33	30	34	35	30	33	30	33	36	40	35	33.25	33.25
Gay butterflies	1	34	54	54	46	39	29	50	85	80	48	56	52	44.5	56.125
Gay butterflies	2	44	59	77	43	52	29	48	60	50	m	m	m	45	54.5
Gay butterflies	3	54	83	87	37	68	59	52	46	55	53	70	69	49	67.125
Gay butterflies	4	45	66	50	50	62	38	49	48	59	39	42	39	45.75	50.5
Gay butterflies	5	49	60	60	46	60	63	39	66	50	48	62	55	45.5	59.5
Gay butterflies	6	60	67	44	64	63	70	50	69	60	62	64	60	59	62.125
Hello Yellow	1	49	54	58	64	87	72	48	42	20	37	55	46	49.5	54.25
Hello Yellow	2	46	70	57	33	34	29	54	54	53	m	m	m	44.3333	49.5
Hello Yellow	3	43	65	60	60	78	58	40	70	40	m	m	m	47.6667	61.8333
Hello Yellow	4	28	50	50	31	45	48	50	39	37	38	41	48	36.75	44.75
Hello Yellow	5	50	55	40	50	57	53	44	47	50	m	m	m	48	50.3333
Hello Yellow	6	30	29	19	56	51	46	59	76	62	45	40	43	47.5	45.75
